# Supplementary material
Source: PubMed Central journal article supplement (PMC8858773)

### Reason(s) to get vaccinated if available with no cost

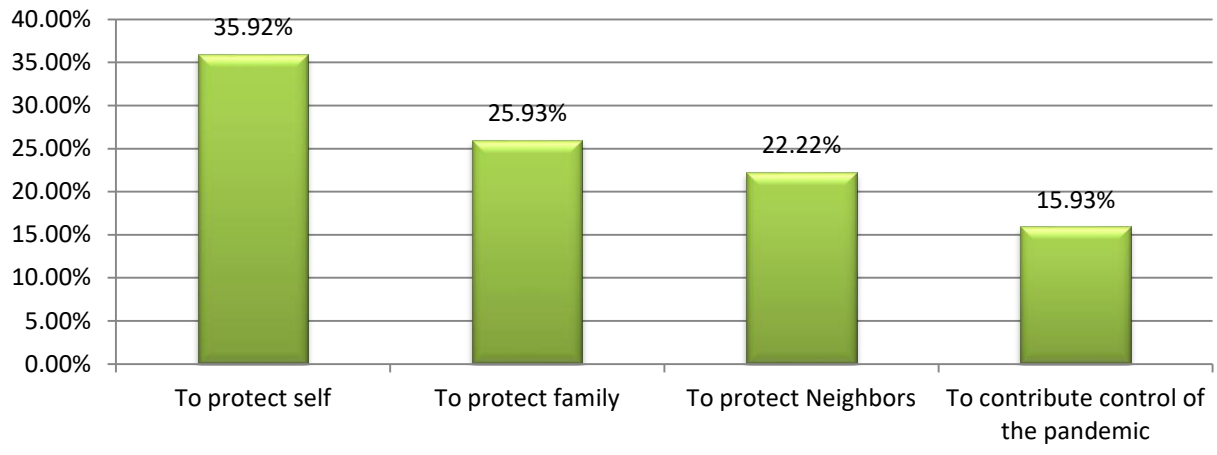

Supplement: mmc1.pdf [file mmc1.pdf]

**Reason(s) of not to get vaccinated against COVID-19, though, it will available**

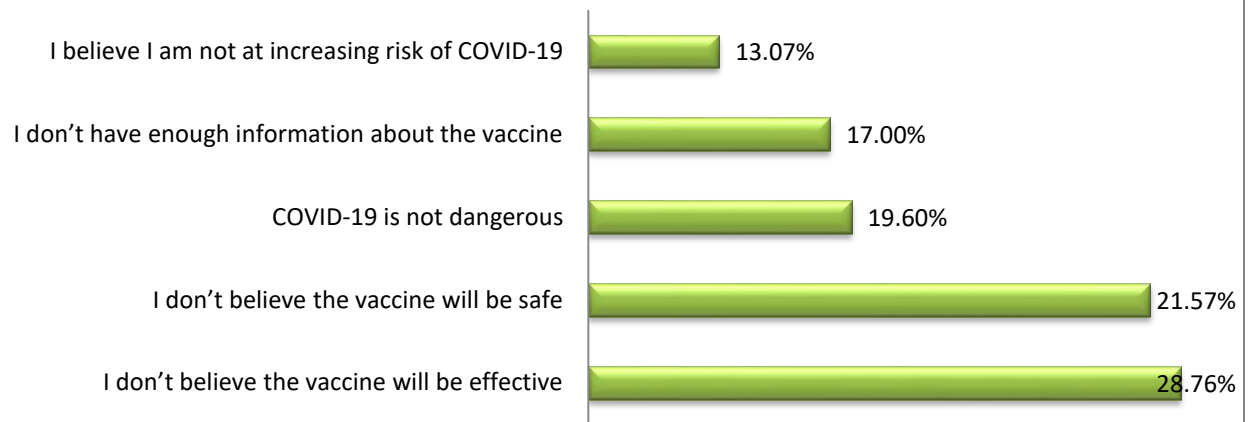

Supplement: mmc2.pdf [file mmc2.pdf]
